# Supplementary material
Source: ML conference proceedings conference paper supplement (https://openaccess.thecvf.com/content/WACV2023/html/Palechor_Large-Scale_Open-Set_Classification_WACV_2023_paper.html)
Supplement: Supplementary file 1 [file Palechor_Large-Scale_Open-Set_Classification_WACV_2023_supplemental.pdf]

# Large-Scale Open-Set Classification Protocols for ImageNet

## Supplemental Material

Andres Palechor      Annesha Bhoumik      Manuel Günther  
Department of Informatics, University of Zurich, Andreasstrasse 15, CH-8050 Zurich  
<https://www.ifi.uzh.ch/en/aiml.html>

### 1. Linear OSCR Curves

Depending on the application, different false positive values are of importance. In the main paper, we focus more on the low FPR regions since these are of more importance when a human needs to look into the positive cases and, hence, large numbers of false positives involve labor cost. When false positives are not of utmost importance, e.g., when handled by an automated system in low-security applications, the focus will be more on having high correct classification rate. Therefore, in Fig. 1 we provide the OSCR plots according to figure 2 of the main paper, but this time with linear FPR axis. These plots highlight even more that the Entropic Open-Set (EOS) and the SoftMax with Background class (BG) approaches fail when known and unknown classes are very similar, as provided in  $P_2$  and  $P_3$ .

### 2. Results Sorted by Protocol

Fig. 2 displays the same results as shown in Figure 2 of the main paper, but here we compare the results of the different protocols. This shows that the definition of our protocols follows our intuition. We can see that protocol  $P_1$  is easy in open-set, but difficult in closed-set operation, especially when looking to the performance of BG and EOS, which are designed for open-set classification. On the opposite, protocol  $P_3$  achieves higher closed-set recognition performance (at FPR = 1) while dropping much faster for lower FPR values. Protocol  $P_2$  is difficult both in closed- and open-set evaluation, but open-set performance does not drop that drastically as in  $P_3$ , especially considering the unknown test data in the second row. Due to its relatively small size,  $P_2$  is optimal for hyperparameter optimization and hyperparameters should be able to be transferred to the other two protocols – unless the algorithm is critical w.r.t. hyperparameters. We leave hyperparameter optimization to future work.

### 3. Detailed Results

In Tab. 1 we include detailed numbers of the values seen in figures 2 and 3 of the main paper. We also include the cases where we use our confidence metric to select the best epoch of training.

When comparing Tab. 1(a) with Tab. 1(b) it can be seen that the selection of the best algorithm based on the confidence score provides better CCR values for BG in protocols  $P_1$  and  $P_2$ , and better or comparable numbers for EOS across all protocols. The advantage of S is not that expressed since S does not take into consideration negative samples and, thus, the confidence for unknown  $\gamma^-$  gets very low in Tab. 1(a). When using our validation metric, training stops early and does not provide a good overall, i.e., closed-set performance. Therefore, we propose to use our novel evaluation metric for training open-set classifiers, but not for closed-set classifiers such as S.

### 4. Detailed List of Classes

For reproducibility, we also provide the list of classes (ImageNet identifier and class name) that we used in our three protocols in Tables 2, 3 and 4. For known and negative classes, we used the samples of the original training partition for training and validation, and the samples from the validation partition for testing – since the test set labels of ILSVRC2012 are still not publicly available.

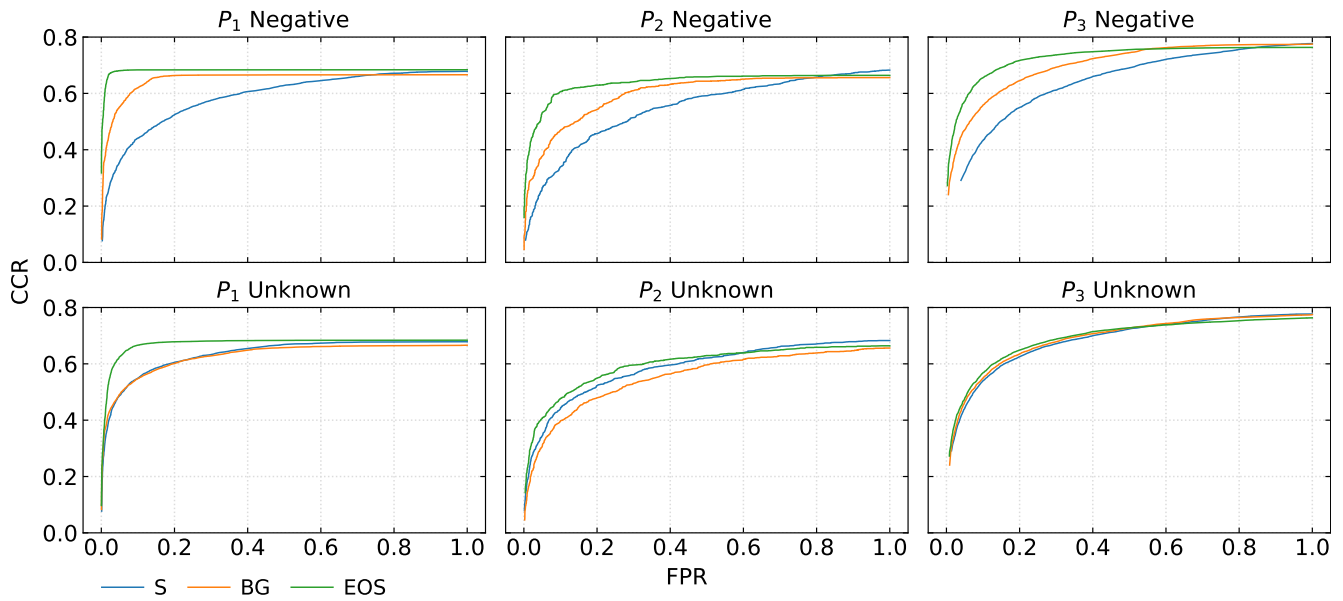

Figure 1: LINEAR OSCR CURVES. OSCR curves in linear scale for negative data (top row) and unknown data (bottom row) of the test set for each protocol.

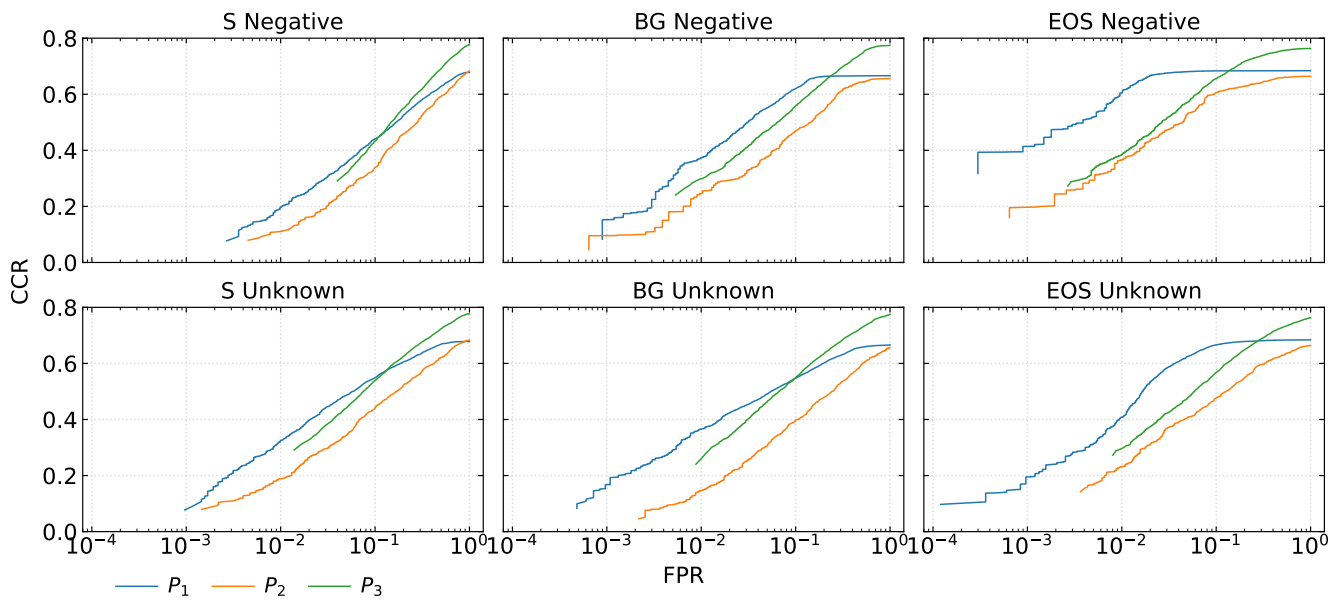

Figure 2: COMPARISON OF PROTOCOLS. OSCR curves are split by algorithm to allow a comparison across protocols. Results are shown for negative data (top row) and unknown data (bottom row).

Table 1: CLASSIFICATION RESULTS. Correct Classification Rates (CCR) are provided at some False Positive Rates (FPR) in the test set. The best CCR values are in bold.  $\gamma^+$  is calculated using known and  $\gamma^-$  using unknown classes.

| (a) Using Last Epoch |       |              |              |                |              |              |              |
|----------------------|-------|--------------|--------------|----------------|--------------|--------------|--------------|
|                      | Epoch | Confidence   |              | CCR at FPR of: |              |              |              |
|                      |       | $\gamma^+$   | $\gamma^-$   | 1e-3           | 1e-2         | 1e-1         | 1            |
| $P_1$ - S            | 120   | <b>0.665</b> | 0.470        | 0.077          | 0.326        | 0.549        | 0.678        |
| $P_1$ - BG           | 120   | 0.650        | 0.520        | 0.146          | 0.342        | 0.519        | 0.663        |
| $P_1$ - EOS          | 120   | 0.663        | <b>0.846</b> | <b>0.195</b>   | <b>0.409</b> | <b>0.667</b> | <b>0.684</b> |
| $P_2$ - S            | 120   | <b>0.665</b> | 0.341        | —              | 0.189        | 0.443        | <b>0.683</b> |
| $P_2$ - BG           | 120   | 0.598        | 0.480        | —              | 0.111        | 0.339        | 0.616        |
| $P_2$ - EOS          | 120   | 0.592        | <b>0.708</b> | —              | <b>0.233</b> | <b>0.476</b> | 0.664        |
| $P_3$ - S            | 120   | <b>0.767</b> | 0.240        | —              | —            | 0.540        | <b>0.777</b> |
| $P_3$ - BG           | 120   | 0.753        | 0.344        | —              | 0.241        | 0.543        | 0.764        |
| $P_3$ - EOS          | 120   | 0.684        | <b>0.687</b> | —              | <b>0.298</b> | <b>0.568</b> | 0.763        |

  

| (b) Using Best Epoch |       |              |              |                |              |              |              |
|----------------------|-------|--------------|--------------|----------------|--------------|--------------|--------------|
|                      | Epoch | Confidence   |              | CCR at FPR of: |              |              |              |
|                      |       | $\gamma^+$   | $\gamma^-$   | 1e-3           | 1e-2         | 1e-1         | 1            |
| $P_1$ - S            | 20    | 0.584        | <b>0.906</b> | 0.270          | 0.543        | 0.664        | 0.667        |
| $P_1$ - BG           | 99    | 0.660        | 0.628        | 0.167          | 0.420        | 0.572        | 0.673        |
| $P_1$ - EOS          | 105   | <b>0.672</b> | 0.877        | <b>0.283</b>   | <b>0.535</b> | <b>0.683</b> | <b>0.694</b> |
| $P_2$ - S            | 39    | 0.603        | 0.528        | <b>0.031</b>   | 0.134        | 0.384        | 0.659        |
| $P_2$ - BG           | 113   | <b>0.638</b> | 0.491        | —              | 0.156        | 0.368        | 0.658        |
| $P_2$ - EOS          | 101   | 0.599        | <b>0.694</b> | —              | <b>0.223</b> | <b>0.473</b> | <b>0.666</b> |
| $P_3$ - S            | 15    | 0.677        | 0.527        | <b>0.083</b>   | 0.239        | 0.509        | 0.745        |
| $P_3$ - BG           | 115   | <b>0.747</b> | 0.379        | —              | 0.243        | 0.539        | 0.761        |
| $P_3$ - EOS          | 114   | 0.696        | <b>0.688</b> | —              | <b>0.266</b> | <b>0.585</b> | <b>0.772</b> |

Table 2: PROTOCOL 1 CLASSES: List of super-classes and leaf nodes of Protocol  $P_1$ .

| Known            |                      | Negative         |                         | Unknown          |                      |
|------------------|----------------------|------------------|-------------------------|------------------|----------------------|
| Id               | Name                 | Id               | Name                    | Id               | Name                 |
| <i>n02084071</i> | <i>dog</i>           | <i>n02118333</i> | <i>fox</i>              | <i>n07555863</i> | <i>food</i>          |
| n02085620        | Chihuahua            | n02119022        | red fox                 | n07684084        | French loaf          |
| n02085782        | Japanese spaniel     | n02119789        | kit fox                 | n07693725        | bagel                |
| n02085936        | Maltese dog          | n02120079        | Arctic fox              | n07695742        | pretzel              |
| n02086079        | Pekinese             | n02120505        | grey fox                | n07714571        | head cabbage         |
| n02086240        | Shih-Tzu             | <i>n02115335</i> | <i>wild dog</i>         | n07714990        | broccoli             |
| n02086646        | Blenheim spaniel     | n02115641        | dingo                   | n07715103        | cauliflower          |
| n02086910        | papillon             | n02115913        | dhole                   | n07716358        | zucchini             |
| n02087046        | toy terrier          | n02116738        | African hunting dog     | n07716906        | spaghetti squash     |
| n02087394        | Rhodesian ridgeback  | <i>n02114100</i> | <i>wolf</i>             | n07717410        | acorn squash         |
| n02088094        | Afghan hound         | n02114367        | timber wolf             | n07717556        | butternut squash     |
| n02088238        | basset               | n02114548        | white wolf              | n07718472        | cucumber             |
| n02088364        | beagle               | n02114712        | red wolf                | n07718747        | artichoke            |
| n02088466        | bloodhound           | n02114855        | coyote                  | n07720875        | bell pepper          |
| n02088632        | bluetick             | <i>n02120997</i> | <i>feline</i>           | n07730033        | cardoon              |
| n02089078        | black-and-tan coonho | n02125311        | cougar                  | n07734744        | mushroom             |
| n02089867        | Walker hound         | n02127052        | lynx                    | n07745940        | strawberry           |
| n02089973        | English foxhound     | n02128385        | leopard                 | n07747607        | orange               |
| n02090379        | redbone              | n02128757        | snow leopard            | n07749582        | lemon                |
| n02090622        | borzoi               | n02128925        | jaguar                  | n07753113        | fig                  |
| n02090721        | Irish wolfhound      | n02129165        | lion                    | n07753275        | pineapple            |
| n02091244        | Ibizan hound         | n02129604        | tiger                   | n07753592        | banana               |
| n02091467        | Norwegian elkhound   | n02130308        | cheetah                 | n07754684        | jackfruit            |
| n02091635        | otterhound           | <i>n02131653</i> | <i>bear</i>             | n07760859        | custard apple        |
| n02091831        | Saluki               | n02132136        | brown bear              | n07768694        | pomegranate          |
| n02092002        | Scottish deerhound   | n02133161        | American black bear     | <i>n03791235</i> | <i>motor vehicle</i> |
| n02092339        | Weimaraner           | n02134084        | ice bear                | n02701002        | ambulance            |
| n02093256        | Staffordshire bullte | n02134418        | sloth bear              | n02704792        | amphibian            |
| n02093428        | American Staffordshi | <i>n02441326</i> | <i>musteline mammal</i> | n02814533        | beach wagon          |
| n02093647        | Bedlington terrier   | n02441942        | weasel                  | n02930766        | cab                  |
| n02093754        | Border terrier       | n02442845        | mink                    | n03100240        | convertible          |
| n02093859        | Kerry blue terrier   | n02443114        | polecat                 | n03345487        | fire engine          |
| n02093991        | Irish terrier        | n02443484        | black-footed ferret     | n03417042        | garbage truck        |
| n02094114        | Norfolk terrier      | n02444819        | otter                   | n03444034        | go-kart              |
| n02094258        | Norwich terrier      | n02445715        | skunk                   | n03594945        | jeep                 |
| n02094433        | Yorkshire terrier    | n02447366        | badger                  | n03670208        | limousine            |
| n02095314        | wire-haired fox terr | <i>n02370806</i> | <i>ungulate</i>         | n03770679        | minivan              |
| n02095570        | Lakeland terrier     | n02389026        | sorrel                  | n03777568        | Model T              |
| n02095889        | Sealyham terrier     | n02391049        | zebra                   | n03785016        | moped                |
| n02096051        | Airedale             | n02395406        | hog                     | n03796401        | moving van           |
| n02096177        | cairn                | n02396427        | wild boar               | n03930630        | pickup               |
| n02096294        | Australian terrier   | n02397096        | warthog                 | n03977966        | police van           |
| n02096437        | Dandie Dinmont       | n02398521        | hippopotamus            | n04037443        | racer                |
| n02096585        | Boston bull          | n02403003        | ox                      | n04252225        | snowplow             |
| n02097047        | miniature schnauzer  | n02408429        | water buffalo           | n04285008        | sports car           |
| n02097130        | giant schnauzer      | n02410509        | bison                   | n04461696        | tow truck            |
| n02097209        | standard schnauzer   | n02412080        | ram                     | n04467665        | trailer truck        |
| n02097298        | Scotch terrier       | n02415577        | bighorn                 | <i>n03183080</i> | <i>device</i>        |
| n02097474        | Tibetan terrier      | n02417914        | ibex                    | n02666196        | abacus               |
| n02097658        | silky terrier        | n02422106        | hartebeest              | n02672831        | accordion            |
| n02098105        | soft-coated wheaten  | n02422699        | impala                  | n02676566        | acoustic guitar      |
| n02098286        | West Highland white  | n02423022        | gazelle                 | n02708093        | analog clock         |
| n02098413        | Lhasa                | n02437312        | Arabian camel           | n02749479        | assault rifle        |
| n02099267        | flat-coated retrieve | n02437616        | llama                   | n02787622        | banjo                |
| n02099429        | curly-coated retriev | <i>n02469914</i> | <i>primate</i>          | n02794156        | barometer            |
| n02099601        | golden retriever     | n02480495        | orangutan               | n02804610        | bassoon              |
| n02099712        | Labrador retriever   | n02480855        | gorilla                 | n02841315        | binoculars           |
| n02099849        | Chesapeake Bay retri | n02481823        | chimpanzee              | n02879718        | bow                  |
| n02100236        | German short-haired  | n02483362        | gibbon                  | n02910353        | buckle               |
| n02100583        | vizsla               | n02483708        | siamang                 | n02948072        | candle               |
| n02100735        | English setter       | n02484975        | guenon                  | n02950826        | cannon               |
| n02100877        | Irish setter         | n02486261        | patas                   | n02965783        | car mirror           |
| n02101006        | Gordon setter        | n02486410        | baboon                  | n02966193        | carousel             |
| n02101388        | Brittany spaniel     | n02487347        | macaque                 | n02974003        | car wheel            |
| n02101556        | clumber              | n02488291        | langur                  | n02977058        | cash machine         |
| n02102040        | English springer     | n02488702        | colobus                 | n02992211        | cello                |
| n02102177        | Welsh springer spani | n02489166        | proboscis monkey        | n03000684        | chain saw            |
| n02102318        | cocker spaniel       | n02490219        | marmoset                | n03017168        | chime                |
| n02102480        | Sussex spaniel       | n02492035        | capuchin                | n03075370        | combination lock     |
| n02102973        | Irish water spaniel  | n02492660        | howler monkey           | n03110669        | cornet               |
| n02104029        | kuvasz               | n02493509        | titi                    | n03126707        | crane                |

Continued on next page

PROTOCOL 1 CLASSES: List of super-classes and leaf nodes of Protocol  $P_1$ .

| Known     |                      | Negative  |                 | Unknown   |                    |
|-----------|----------------------|-----------|-----------------|-----------|--------------------|
| Id        | Name                 | Id        | Name            | Id        | Name               |
| n02104365 | schipperke           | n02493793 | spider monkey   | n03180011 | desktop computer   |
| n02105056 | groenendael          | n02494079 | squirrel monkey | n03196217 | digital clock      |
| n02105162 | malinois             | n02497673 | Madagascar cat  | n03197337 | digital watch      |
| n02105251 | briard               | n02500267 | indri           | n03208938 | disk brake         |
| n02105412 | kelpie               |           |                 | n03249569 | drum               |
| n02105505 | komondor             |           |                 | n03271574 | electric fan       |
| n02105641 | Old English sheepdog |           |                 | n03272010 | electric guitar    |
| n02105855 | Shetland sheepdog    |           |                 | n03372029 | flute              |
| n02106030 | collie               |           |                 | n03394916 | French horn        |
| n02106166 | Border collie        |           |                 | n03425413 | gas pump           |
| n02106382 | Bouvier des Flandres |           |                 | n03447721 | gong               |
| n02106550 | Rottweiler           |           |                 | n03452741 | grand piano        |
| n02106662 | German shepherd      |           |                 | n03467068 | guillotine         |
| n02107142 | Doberman             |           |                 | n03476684 | hair slide         |
| n02107312 | miniature pinscher   |           |                 | n03485407 | hand-held computer |
| n02107574 | Greater Swiss Mounta |           |                 | n03492542 | hard disc          |
| n02107683 | Bernese mountain dog |           |                 | n03494278 | harmonica          |
| n02107908 | Appenzeller          |           |                 | n03495258 | harp               |
| n02108000 | EntleBucher          |           |                 | n03496892 | harvester          |
| n02108089 | boxer                |           |                 | n03532672 | hook               |
| n02108422 | bull mastiff         |           |                 | n03544143 | hourglass          |
| n02108551 | Tibetan mastiff      |           |                 | n03590841 | jack-o'-lantern    |
| n02108915 | French bulldog       |           |                 | n03627232 | knot               |
| n02109047 | Great Dane           |           |                 | n03642806 | laptop             |
| n02109525 | Saint Bernard        |           |                 | n03666591 | lighter            |
| n02109961 | Eskimo dog           |           |                 | n03691459 | loudspeaker        |
| n02110063 | malamute             |           |                 | n03692522 | loupe              |
| n02110185 | Siberian husky       |           |                 | n03706229 | magnetic compass   |
| n02110341 | dalmatian            |           |                 | n03720891 | maraca             |
| n02110627 | affenpinscher        |           |                 | n03721384 | marimba            |
| n02110806 | basenji              |           |                 | n03733131 | maypole            |
| n02110958 | pug                  |           |                 | n03759954 | microphone         |
| n02111129 | Leonberg             |           |                 | n03773504 | missile            |
| n02111277 | Newfoundland         |           |                 | n03793489 | mouse              |
| n02111500 | Great Pyrenees       |           |                 | n03794056 | mousetrap          |
| n02111889 | Samoyed              |           |                 | n03803284 | muzzle             |
| n02112018 | Pomeranian           |           |                 | n03804744 | nail               |
| n02112137 | chow                 |           |                 | n03814639 | neck brace         |
| n02112350 | keeshond             |           |                 | n03832673 | notebook           |
| n02112706 | Brabancon griffon    |           |                 | n03838899 | oboe               |
| n02113023 | Pembroke             |           |                 | n03840681 | ocarina            |
| n02113186 | Cardigan             |           |                 | n03841143 | odometer           |
| n02113624 | toy poodle           |           |                 | n03843555 | oil filter         |
| n02113712 | miniature poodle     |           |                 | n03854065 | organ              |
| n02113799 | standard poodle      |           |                 | n03868863 | oxygen mask        |
| n02113978 | Mexican hairless     |           |                 | n03874293 | paddlewheel        |
|           |                      |           |                 | n03874599 | padlock            |
|           |                      |           |                 | n03884397 | panpipe            |
|           |                      |           |                 | n03891332 | parking meter      |
|           |                      |           |                 | n03929660 | pick               |
|           |                      |           |                 | n03933933 | pier               |
|           |                      |           |                 | n03944341 | pinwheel           |
|           |                      |           |                 | n03992509 | potter's wheel     |
|           |                      |           |                 | n03995372 | power drill        |
|           |                      |           |                 | n04008634 | projectile         |
|           |                      |           |                 | n04009552 | projector          |
|           |                      |           |                 | n04040759 | radiator           |
|           |                      |           |                 | n04044716 | radio telescope    |
|           |                      |           |                 | n04067472 | reel               |
|           |                      |           |                 | n04074963 | remote control     |
|           |                      |           |                 | n04086273 | revolver           |
|           |                      |           |                 | n04090263 | rifle              |
|           |                      |           |                 | n04118776 | rule               |
|           |                      |           |                 | n04127249 | safety pin         |
|           |                      |           |                 | n04141076 | sax                |
|           |                      |           |                 | n04141975 | scale              |
|           |                      |           |                 | n04152593 | screen             |
|           |                      |           |                 | n04153751 | screw              |
|           |                      |           |                 | n04228054 | ski                |
|           |                      |           |                 | n04238763 | slide rule         |
|           |                      |           |                 | n04243546 | slot               |
|           |                      |           |                 | n04251144 | snorkel            |

Continued on next page

PROTOCOL 1 CLASSES: List of super-classes and leaf nodes of Protocol  $P_1$ .

| Known |      | Negative |      | Unknown   |                     |
|-------|------|----------|------|-----------|---------------------|
| Id    | Name | Id       | Name | Id        | Name                |
|       |      |          |      | n04258138 | solar dish          |
|       |      |          |      | n04265275 | space heater        |
|       |      |          |      | n04275548 | spider web          |
|       |      |          |      | n04286575 | spotlight           |
|       |      |          |      | n04311174 | steel drum          |
|       |      |          |      | n04317175 | stethoscope         |
|       |      |          |      | n04328186 | stopwatch           |
|       |      |          |      | n04330267 | stove               |
|       |      |          |      | n04332243 | strainer            |
|       |      |          |      | n04355338 | sundial             |
|       |      |          |      | n04355933 | sunglass            |
|       |      |          |      | n04356056 | sunglasses          |
|       |      |          |      | n04372370 | switch              |
|       |      |          |      | n04376876 | syringe             |
|       |      |          |      | n04428191 | thresher            |
|       |      |          |      | n04456115 | torch               |
|       |      |          |      | n04485082 | tripod              |
|       |      |          |      | n04487394 | trombone            |
|       |      |          |      | n04505470 | typewriter keyboard |
|       |      |          |      | n04515003 | upright             |
|       |      |          |      | n04525305 | vending machine     |
|       |      |          |      | n04536866 | violin              |
|       |      |          |      | n04548280 | wall clock          |
|       |      |          |      | n04579432 | whistle             |
|       |      |          |      | n04592741 | wing                |
|       |      |          |      | n06359193 | web site            |

End of table Protocol 1

Table 3: PROTOCOL 2 CLASSES: List of super-classes and leaf nodes of Protocol  $P_2$ .

| Known            |                      | Negative         |                      | Unknown          |                         |
|------------------|----------------------|------------------|----------------------|------------------|-------------------------|
| Id               | Name                 | Id               | Name                 | Id               | Name                    |
| <i>n02087122</i> | <i>hunting dog</i>   | <i>n02087122</i> | <i>hunting dog</i>   | <i>n02085374</i> | <i>toy dog</i>          |
| n02087394        | Rhodesian ridgeback  | n02096051        | Airedale             | n02085620        | Chihuahua               |
| n02088094        | Afghan hound         | n02096177        | cairn                | n02085782        | Japanese spaniel        |
| n02088238        | basset               | n02096294        | Australian terrier   | n02085936        | Maltese dog             |
| n02088364        | beagle               | n02096437        | Dandie Dinmont       | n02086079        | Pekinese dog            |
| n02088466        | bloodhound           | n02096585        | Boston bull          | n02086240        | Shih-Tzu                |
| n02088632        | bluetick             | n02097047        | miniature schnauzer  | n02086646        | Blenheim spaniel        |
| n02089078        | black-and-tan coonho | n02097130        | giant schnauzer      | n02086910        | papillon                |
| n02089867        | Walker hound         | n02097209        | standard schnauzer   | n02087046        | toy terrier             |
| n02089973        | English foxhound     | n02097298        | Scotch terrier       | <i>n02118333</i> | <i>fox</i>              |
| n02090379        | redbone              | n02097474        | Tibetan terrier      | n02119022        | red fox                 |
| n02090622        | borzoi               | n02097658        | silky terrier        | n02119789        | kit fox                 |
| n02090721        | Irish wolfhound      | n02098105        | soft-coated wheaten  | n02120079        | Arctic fox              |
| n02091244        | Ibizan hound         | n02098286        | West Highland white  | n02120505        | grey fox                |
| n02091467        | Norwegian elkhound   | n02098413        | Lhasa                | <i>n02115335</i> | <i>wild dog</i>         |
| n02091635        | otterhound           | n02099267        | flat-coated retrieve | n02115641        | dingo                   |
| n02091831        | Saluki               | n02099429        | curly-coated retriev | n02115913        | dhole                   |
| n02092002        | Scottish deerhound   | n02099601        | golden retriever     | n02116738        | African hunting dog     |
| n02092339        | Weimaraner           | n02099712        | Labrador retriever   | <i>n02114100</i> | <i>wolf</i>             |
| n02093256        | Staffordshire bullte | n02099849        | Chesapeake Bay retri | n02114367        | timber wolf             |
| n02093428        | American Staffordshi | n02100236        | German short-haired  | n02114548        | white wolf              |
| n02093647        | Bedlington terrier   | n02100583        | vizsla               | n02114712        | red wolf                |
| n02093754        | Border terrier       | n02100735        | English setter       | n02114855        | coyote                  |
| n02093859        | Kerry blue terrier   | n02100877        | Irish setter         | <i>n02120997</i> | <i>feline</i>           |
| n02093991        | Irish terrier        | n02101006        | Gordon setter        | n02125311        | cougar                  |
| n02094114        | Norfolk terrier      | n02101388        | Brittany spaniel     | n02127052        | lynx                    |
| n02094258        | Norwich terrier      | n02101556        | clumber              | n02128385        | leopard                 |
| n02094433        | Yorkshire terrier    | n02102040        | English springer     | n02128757        | snow leopard            |
| n02095314        | wire-haired fox terr | n02102177        | Welsh springer spani | n02128925        | jaguar                  |
| n02095570        | Lakeland terrier     | n02102318        | cocker spaniel       | n02129165        | lion                    |
| n02095889        | Sealyham terrier     | n02102480        | Sussex spaniel       | n02129604        | tiger                   |
|                  |                      | n02102973        | Irish water spaniel  | n02130308        | cheetah                 |
|                  |                      |                  |                      | <i>n02131653</i> | <i>bear</i>             |
|                  |                      |                  |                      | n02132136        | brown bear              |
|                  |                      |                  |                      | n02133161        | American black bear     |
|                  |                      |                  |                      | n02134084        | ice bear                |
|                  |                      |                  |                      | n02134418        | sloth bear              |
|                  |                      |                  |                      | <i>n02441326</i> | <i>musteline mammal</i> |
|                  |                      |                  |                      | n02441942        | weasel                  |
|                  |                      |                  |                      | n02442845        | mink                    |
|                  |                      |                  |                      | n02443114        | polecat                 |
|                  |                      |                  |                      | n02443484        | black-footed ferret     |
|                  |                      |                  |                      | n02444819        | otter                   |
|                  |                      |                  |                      | n02445715        | skunk                   |
|                  |                      |                  |                      | n02447366        | badger                  |
|                  |                      |                  |                      | <i>n02370806</i> | <i>ungulate</i>         |
|                  |                      |                  |                      | n02389026        | sorrel                  |
|                  |                      |                  |                      | n02391049        | zebra                   |
|                  |                      |                  |                      | n02395406        | hog                     |
|                  |                      |                  |                      | n02396427        | wild boar               |
|                  |                      |                  |                      | n02397096        | warthog                 |
|                  |                      |                  |                      | n02398521        | hippopotamus            |
|                  |                      |                  |                      | n02403003        | ox                      |
|                  |                      |                  |                      | n02408429        | water buffalo           |
|                  |                      |                  |                      | n02410509        | bison                   |
|                  |                      |                  |                      | n02412080        | ram                     |
|                  |                      |                  |                      | n02415577        | bighorn                 |
|                  |                      |                  |                      | n02417914        | ibex                    |
|                  |                      |                  |                      | n02422106        | hartebeest              |
|                  |                      |                  |                      | n02422699        | impala                  |
|                  |                      |                  |                      | n02423022        | gazelle                 |
|                  |                      |                  |                      | n02437312        | Arabian camel           |
|                  |                      |                  |                      | n02437616        | llama                   |

End of table Protocol 2

Table 4: PROTOCOL 3 CLASSES: List of super-classes and leaf nodes of Protocol  $P_3$ .

| Known            |                      | Negative         |                      | Unknown          |                      |
|------------------|----------------------|------------------|----------------------|------------------|----------------------|
| Id               | Name                 | Id               | Name                 | Id               | Name                 |
| <i>n02084071</i> | <i>dog</i>           | <i>n02084071</i> | <i>dog</i>           | <i>n02084071</i> | <i>dog</i>           |
| n02085620        | Chihuahua            | n02085782        | Japanese spaniel     | n02086079        | Pekinese             |
| n02085936        | Maltese dog          | n02086646        | Blenheim spaniel     | n02088094        | Afghan hound         |
| n02086240        | Shih-Tzu             | n02087046        | toy terrier          | n02089867        | Walker hound         |
| n02086910        | papillon             | n02088364        | beagle               | n02091467        | Norwegian elkhound   |
| n02087394        | Rhodesian ridgeback  | n02088632        | bluetick             | n02093428        | American Staffordshi |
| n02088238        | basset               | n02090379        | redbone              | n02094258        | Norwich terrier      |
| n02088466        | bloodhound           | n02090721        | Irish wolfhound      | n02096177        | cairn                |
| n02089078        | black-and-tan coonho | n02091831        | Saluki               | n02097209        | standard schnauzer   |
| n02089973        | English foxhound     | n02092339        | Weimaraner           | n02098413        | Lhasa                |
| n02090622        | borzoi               | n02093754        | Border terrier       | n02100236        | German short-haired  |
| n02091244        | Ibizan hound         | n02093991        | Irish terrier        | n02101556        | clumber              |
| n02091635        | otterhound           | n02095314        | wire-haired fox terr | n02104029        | kuvasz               |
| n02092002        | Scottish deerhound   | n02095889        | Sealyham terrier     | n02105505        | komondor             |
| n02093256        | Staffordshire bullte | n02096437        | Dandie Dinmont       | n02106550        | Rottweiler           |
| n02093647        | Bedlington terrier   | n02097047        | miniature schnauzer  | n02107908        | Appenzeller          |
| n02093859        | Kerry blue terrier   | n02097474        | Tibetan terrier      | n02109047        | Great Dane           |
| n02094114        | Norfolk terrier      | n02098105        | soft-coated wheaten  | n02110627        | affenpinscher        |
| n02094433        | Yorkshire terrier    | n02099429        | curly-coated retriev | n02111889        | Samoyed              |
| n02095570        | Lakeland terrier     | n02099712        | Labrador retriever   | n02113186        | Cardigan             |
| n02096051        | Airedale             | n02100735        | English setter       | <i>n01503061</i> | <i>bird</i>          |
| n02096294        | Australian terrier   | n02101006        | Gordon setter        | n01530575        | brambling            |
| n02096585        | Boston bull          | n02102177        | Welsh springer spani | n01560419        | bulbul               |
| n02097130        | giant schnauzer      | n02102480        | Sussex spaniel       | n01614925        | bald eagle           |
| n02097298        | Scotch terrier       | n02105056        | groenendael          | n01820546        | lorikeet             |
| n02097658        | silky terrier        | n02105251        | briard               | n01843383        | toucan               |
| n02098286        | West Highland white  | n02105855        | Shetland sheepdog    | n02002724        | black stork          |
| n02099267        | flat-coated retrieve | n02106166        | Border collie        | n02012849        | crane                |
| n02099601        | golden retriever     | n02107142        | Doberman             | n02027492        | red-backed sandpiper |
| n02099849        | Chesapeake Bay retri | n02107574        | Greater Swiss Mounta | n02058221        | albatross            |
| n02100583        | vizsla               | n02108089        | boxer                | <i>n02159955</i> | <i>insect</i>        |
| n02100877        | Irish setter         | n02108551        | Tibetan mastiff      | n02168699        | long-horned beetle   |
| n02101388        | Brittany spaniel     | n02109961        | Eskimo dog           | n02206856        | bee                  |
| n02102040        | English springer     | n02110185        | Siberian husky       | n02236044        | mantis               |
| n02102318        | cocker spaniel       | n02110958        | pug                  | n02276258        | admiral              |
| n02102973        | Irish water spaniel  | n02111277        | Newfoundland         | <i>n03405725</i> | <i>furniture</i>     |
| n02104365        | schipperke           | n02112137        | chow                 | n03016953        | chiffonier           |
| n02105162        | malinois             | n02112706        | Brabancon griffon    | n03290653        | entertainment center |
| n02105412        | kelpie               | n02113712        | miniature poodle     | n04099969        | rocking chair        |
| n02105641        | Old English sheepdog | n02113978        | Mexican hairless     | <i>n02512053</i> | <i>fish</i>          |
| n02106030        | collie               | <i>n01503061</i> | <i>bird</i>          | n01491361        | tiger shark          |
| n02106382        | Bouvier des Flandres | n01514859        | hen                  | n02536864        | coho                 |
| n02106662        | German shepherd      | n01532829        | house finch          | n02655020        | puffer               |
| n02107312        | miniature pinscher   | n01537544        | indigo bunting       | <i>n02484322</i> | <i>monkey</i>        |
| n02107683        | Bernese mountain dog | n01582220        | magpie               | n02487347        | macaque              |
| n02108000        | EntleBucher          | n01601694        | water ouzel          | n02492660        | howler monkey        |
| n02108422        | bull mastiff         | n01622779        | great grey owl       | <i>n02958343</i> | <i>car</i>           |
| n02108915        | French bulldog       | n01818515        | macaw                | n03100240        | convertible          |
| n02109525        | Saint Bernard        | n01828970        | bee eater            | n04285008        | sports car           |
| n02110063        | malamute             | n01833805        | hummingbird          | <i>n02120997</i> | <i>feline</i>        |
| n02110341        | dalmatian            | n01855032        | red-breasted mergans | n02128757        | snow leopard         |
| n02110806        | basenji              | n01860187        | black swan           | <i>n04490091</i> | <i>truck</i>         |
| n02111129        | Leonberg             | n02007558        | flamingo             | n03930630        | pickup               |
| n02111500        | Great Pyrenees       | n02009912        | American egret       | <i>n13134947</i> | <i>fruit</i>         |
| n02112018        | Pomeranian           | n02017213        | European gallinule   | n12267677        | acorn                |
| n02112350        | keeshond             | n02018795        | bustard              | <i>n12992868</i> | <i>fungus</i>        |
| n02113023        | Pembroke             | n02033041        | dowitcher            | n13040303        | stinkhorn            |
| n02113624        | toy poodle           | n02051845        | pelican              | <i>n02858304</i> | <i>boat</i>          |
| n02113799        | standard poodle      | <i>n02159955</i> | <i>insect</i>        | n03662601        | lifeboat             |
| <i>n01503061</i> | <i>bird</i>          | n02165456        | ladybug              | <i>n03082979</i> | <i>computer</i>      |
| n01514668        | cock                 | n02172182        | dung beetle          | n03832673        | notebook             |
| n01518878        | ostrich              | n02177972        | weevil               | <i>n01661091</i> | <i>reptile</i>       |
| n01531178        | goldfinch            | n02226429        | grasshopper          | n01664065        | loggerhead           |
| n01534433        | junco                | n02231487        | walking stick        | n01665541        | leatherback turtle   |
| n01558993        | robin                | n02259212        | leafhopper           | n01667114        | mud turtle           |
| n01580077        | jay                  | n02268443        | dragonfly            | n01667778        | terrapi              |
| n01592084        | chickadee            | n02279972        | monarch              | n01669191        | box turtle           |
| n01608432        | kite                 | n02281406        | sulphur butterfly    | n01675722        | banded gecko         |
| n01616318        | vulture              | <i>n03405725</i> | <i>furniture</i>     | n01677366        | common iguana        |
| n01817953        | African grey         | n02804414        | bassinet             | n01682714        | American chameleon   |
| n01819313        | sulphur-crested cock | n03125729        | cradle               | n01685808        | whiptail             |

Continued on next page



PROTOCOL 3 CLASSES: List of super-classes and leaf nodes of Protocol  $P_3$ .

| Known            |                   | Negative         |                    | Unknown          |                    |
|------------------|-------------------|------------------|--------------------|------------------|--------------------|
| Id               | Name              | Id               | Name               | Id               | Name               |
| n01824575        | coucal            | n03179701        | desk               | n01687978        | agama              |
| n01829413        | hornbill          | n03376595        | folding chair      | n01688243        | frilled lizard     |
| n01843065        | jacamar           | n03742115        | medicine chest     | n01689811        | alligator lizard   |
| n01847000        | drake             | n04380533        | table lamp         | n01692333        | Gila monster       |
| n01855672        | goose             | n04447861        | toilet seat        | n01693334        | green lizard       |
| n02002556        | white stork       | <i>n02512053</i> | <i>fish</i>        | n01694178        | African chameleon  |
| n02006656        | spoonbill         | n01443537        | goldfish           | n01695060        | Komodo dragon      |
| n02009229        | little blue heron | n01496331        | electric ray       | n01697457        | African crocodile  |
| n02011460        | bittern           | n02514041        | barracouta         | n01698640        | American alligator |
| n02013706        | limpkin           | n02607072        | anemone fish       | n01704323        | triceratops        |
| n02018207        | American coot     | n02641379        | gar                | n01728572        | thunder snake      |
| n02025239        | ruddy turnstone   | <i>n02484322</i> | <i>monkey</i>      | n01728920        | ringneck snake     |
| n02028035        | redshank          | n02486261        | patas              | n01729322        | hognose snake      |
| n02037110        | oystercatcher     | n02488702        | colobus            | n01729977        | green snake        |
| n02056570        | king penguin      | n02490219        | marmoset           | n01734418        | king snake         |
| <i>n02159955</i> | <i>insect</i>     | n02493793        | spider monkey      | n01735189        | garter snake       |
| n02165105        | tiger beetle      | <i>n02958343</i> | <i>car</i>         | n01737021        | water snake        |
| n02167151        | ground beetle     | n02814533        | beach wagon        | n01739381        | vine snake         |
| n02169497        | leaf beetle       | n03670208        | limousine          | n01740131        | night snake        |
| n02174001        | rhinoceros beetle | n03777568        | Model T            | n01742172        | boa constrictor    |
| n02190166        | fly               | <i>n02120997</i> | <i>feline</i>      | n01744401        | rock python        |
| n02219486        | ant               | n02127052        | lynx               | n01748264        | Indian cobra       |
| n02229544        | cricket           | n02129165        | lion               | n01749939        | green mamba        |
| n02233338        | cockroach         | n02130308        | cheetah            | n01751748        | sea snake          |
| n02256656        | cicada            | <i>n04490091</i> | <i>truck</i>       | n01753488        | horned viper       |
| n02264363        | lacewing          | n03417042        | garbage truck      | n01755581        | diamondback        |
| n02268853        | damsel fly        | n04461696        | tow truck          | n01756291        | sidewinder         |
| n02277742        | ringlet           | <i>n13134947</i> | <i>fruit</i>       | <i>n03051540</i> | <i>clothing</i>    |
| n02280649        | cabbage butterfly | n11879895        | rapeseed           | n02667093        | abaya              |
| n02281787        | lycaenid          | n12768682        | buckeye            | n02669723        | academic gown      |
| <i>n03405725</i> | <i>furniture</i>  | <i>n12992868</i> | <i>fungus</i>      | n02730930        | apron              |
| n02791124        | barber chair      | n12998815        | agaric             | n02807133        | bathing cap        |
| n02870880        | bookcase          | n13052670        | hen-of-the-woods   | n02817516        | bearskin           |
| n03018349        | china cabinet     | <i>n02858304</i> | <i>boat</i>        | n02837789        | bikini             |
| n03131574        | crib              | n03344393        | fireboat           | n02865351        | bolo tie           |
| n03201208        | dining table      | n04612504        | yawl               | n02869837        | bonnet             |
| n03337140        | file              | <i>n03082979</i> | <i>computer</i>    | n02883205        | bow tie            |
| n03388549        | four-poster       | n03485407        | hand-held computer | n02892767        | brassiere          |
| n03891251        | park bench        | n06359193        | web site           | n02963159        | cardigan           |
| n04344873        | studio couch      |                  |                    | n03026506        | Christmas stocking |
| n04429376        | throne            |                  |                    | n03124170        | cowboy hat         |
| n04550184        | wardrobe          |                  |                    | n03127747        | crash helmet       |
| <i>n02512053</i> | <i>fish</i>       |                  |                    | n03188531        | diaper             |
| n01440764        | tench             |                  |                    | n03325584        | feather boa        |
| n01484850        | great white shark |                  |                    | n03379051        | football helmet    |
| n01494475        | hammerhead        |                  |                    | n03404251        | fur coat           |
| n01498041        | stingray          |                  |                    | n03450230        | gown               |
| n02526121        | eel               |                  |                    | n03534580        | hoopskirt          |
| n02606052        | rock beauty       |                  |                    | n03594734        | jean               |
| n02640242        | sturgeon          |                  |                    | n03595614        | jersey             |
| n02643566        | lionfish          |                  |                    | n03617480        | kimono             |
| <i>n02484322</i> | <i>monkey</i>     |                  |                    | n03623198        | knee pad           |
| n02484975        | guenon            |                  |                    | n03630383        | lab coat           |
| n02486410        | baboon            |                  |                    | n03710637        | maillot            |
| n02488291        | langur            |                  |                    | n03710721        | maillot            |
| n02489166        | proboscis monkey  |                  |                    | n03724870        | mask               |
| n02492035        | capuchin          |                  |                    | n03763968        | military uniform   |
| n02493509        | titi              |                  |                    | n03770439        | miniskirt          |
| n02494079        | squirrel monkey   |                  |                    | n03775071        | mitten             |
| <i>n02958343</i> | <i>car</i>        |                  |                    | n03787032        | mortarboard        |
| n02701002        | ambulance         |                  |                    | n03866082        | overskirt          |
| n02930766        | cab               |                  |                    | n03877472        | pajama             |
| n03594945        | jeep              |                  |                    | n03980874        | poncho             |
| n03770679        | minivan           |                  |                    | n04136333        | sarong             |
| n04037443        | racer             |                  |                    | n04162706        | seat belt          |
| <i>n02120997</i> | <i>feline</i>     |                  |                    | n04209133        | shower cap         |
| n02125311        | cougar            |                  |                    | n04254777        | sock               |
| n02128385        | leopard           |                  |                    | n04259630        | sombrero           |
| n02128925        | jaguar            |                  |                    | n04325704        | stole              |
| n02129604        | tiger             |                  |                    | n04350905        | suit               |
| <i>n04490091</i> | <i>truck</i>      |                  |                    | n04370456        | sweatshirt         |
| n03345487        | fire engine       |                  |                    | n04371430        | swimming trunks    |

Continued on next page

PROTOCOL 3 CLASSES: List of super-classes and leaf nodes of Protocol  $P_3$ .

| Known            |                  | Negative |      | Unknown          |                  |
|------------------|------------------|----------|------|------------------|------------------|
| Id               | Name             | Id       | Name | Id               | Name             |
| n03796401        | moving van       |          |      | n04479046        | trench coat      |
| n03977966        | police van       |          |      | n04532106        | vestment         |
| n04467665        | trailer truck    |          |      | n04584207        | wig              |
| <i>n13134947</i> | <i>fruit</i>     |          |      | n04591157        | Windsor tie      |
| n07742313        | Granny Smith     |          |      | <i>n02370806</i> | <i>ungulate</i>  |
| n12144580        | corn             |          |      | n02389026        | sorrel           |
| n12620546        | hip              |          |      | n02391049        | zebra            |
| n13133613        | ear              |          |      | n02395406        | hog              |
| <i>n12992868</i> | <i>fungus</i>    |          |      | n02396427        | wild boar        |
| n12985857        | coral fungus     |          |      | n02397096        | warthog          |
| n13037406        | gyromitra        |          |      | n02398521        | hippopotamus     |
| n13044778        | earthstar        |          |      | n02403003        | ox               |
| n13054560        | bolete           |          |      | n02408429        | water buffalo    |
| <i>n02858304</i> | <i>boat</i>      |          |      | n02410509        | bison            |
| n02951358        | canoe            |          |      | n02412080        | ram              |
| n03447447        | gondola          |          |      | n02415577        | bighorn          |
| n04273569        | speedboat        |          |      | n02417914        | ibex             |
| <i>n03082979</i> | <i>computer</i>  |          |      | n02422106        | hartebeest       |
| n03180011        | desktop computer |          |      | n02422699        | impala           |
| n03642806        | laptop           |          |      | n02423022        | gazelle          |
| n04238763        | slide rule       |          |      | n02437312        | Arabian camel    |
|                  |                  |          |      | n02437616        | llama            |
|                  |                  |          |      | <i>n07707451</i> | <i>vegetable</i> |
|                  |                  |          |      | n07714571        | head cabbage     |
|                  |                  |          |      | n07714990        | broccoli         |
|                  |                  |          |      | n07715103        | cauliflower      |
|                  |                  |          |      | n07716358        | zucchini         |
|                  |                  |          |      | n07716906        | spaghetti squash |
|                  |                  |          |      | n07717410        | acorn squash     |
|                  |                  |          |      | n07717556        | butternut squash |
|                  |                  |          |      | n07718472        | cucumber         |
|                  |                  |          |      | n07718747        | artichoke        |
|                  |                  |          |      | n07720875        | bell pepper      |
|                  |                  |          |      | n07730033        | cardoon          |
|                  |                  |          |      | n07734744        | mushroom         |
|                  |                  |          |      | <i>n02686568</i> | <i>aircraft</i>  |
|                  |                  |          |      | n02690373        | airliner         |
|                  |                  |          |      | n02692877        | airship          |
|                  |                  |          |      | n02782093        | balloon          |

End of table Protocol 3
